# Supplementary material for: Improved <em>piggyBac</em> Transformation with Capped Transposase mRNA in Pest Insects
Source: Preprints.org preprint supplement (doi:10.20944/preprints202308.2202.v1), 2023-09-01
Supplement: Supplementary file 1 [file Table S1.xlsx]

## Sheet: Sheet1
Exp. No.	helper template	[helper/ donor] (ng/ul)	donor construct	donor plasmid (insert) size (bp)	no. injected embryos	no. G0 larvae	hatch rate (%)	no. G0 adults	eclosion rate (%)	group size	total families	% fertile families	no. transg. families	no. transg events	no. transg. events/G0	total no. G1 screened	total no. G1 screened / transg. line	no. inj. embryos/ transg. line	transf. eff. (%)
1	pBac	300/150	AH452	(5267) 8649	623 *	182	29.2135	143	78.5714	7-15	8	100	4	4	1	n.d	n.d	155.75	2.7972
2	pBac	200/500	V3	(3545) 6911	234	73	31.1966	63	86.3014	1-15	25	52	1	1	1	8830	8830	234	1.25
3	pBac	400/600	V285	(5180) 8682	705	182	25.8156	117	64.2857	1-11	18	88.8889	2	2	1	14966	7483	352.5	1.7094
4	pBac	300/500	V286	(5600) 9102	680	91	13.3824	38	41.7582	1-8	15	60	0	0	na	8772	n.a.	n.a.	0
5	pBac	160/185	V258	(6190) 9690	922	96	10.4121	36	37.5	1-7	18	83.3333	0	0	na	6631	n.a.	n.a.	0
6	pBac	400/600 and 228/342	V258	(6190) 9690	599	145	24.207	50	34.4828	3-16	11	100	0	0	na	18721	n.a.	n.a.	0
7	pBac	300/150	V257	(7088) 10587	1113	474	42.5876	362	76.3713	2-15	26	100	2	2	n.d.	93998	46999	556.5	0.552486
8	pBac	200/500	V19	(3630) 7163	257	47	18.2879	30	63.8298	4-15	9	100	2	2	1	5185	2592.5	128.5	6.66667
9	pBac	300/500	V19	(3630) 7163	192	65	33.8542	40	61.5385	2-9	11	63.6364	0	0	na	2679	n.a.	n.a.	0
10	pBac	200/500	V19	(3630) 7163	399	54	13.5338	33	61.1111	1-5	13	46.1538	0	0	na	1313	n.a.	n.a.	0
11	pBac	200/500	V19	(3630) 7163	462	68	14.7186	33	48.5294	8-9 ***	7	100	2	2	1	1389	694.5	231	6.06061
12	pBac	300/300	V368	(5835) 11097	257	15	5.83658	9	60	1 (M), 1-5 (F)	7	42.8571	0	0	na	502	n.a.	n.a.	0
13	pBac	100/300	V368	(5835) 11097	148	8	5.40541	5	62.5	1 (M), 1-5 (F)	4	75	0	0	na	382	n.a.	n.a.	0
14	HypB	100/200	V286	(5600) 9102	594	48	8.08081	36	75	1-9	12	75	0	0	na	9382	n.a.	n.a.	0
15	HypB	200/200	V286	(5600) 9102	730	63	8.63014	50	79.3651	1-7	17	70.5882	0	0	na	7604	n.a.	n.a.	0
16	HypB	200/200	V258	(6190) 9690	895	61	6.81564	40	65.5738	1-4	13	69.2308	0	0	na	5199	n.a.	n.a.	0
