# Supplementary material for: Improved <em>piggyBac</em> Transformation with Capped Transposase mRNA in Pest Insects
Source: Preprints.org preprint supplement (doi:10.20944/preprints202308.2202.v1), 2023-09-01
Supplement: Supplementary file 2 [file Table S2.xlsx]

## Sheet: Sheet1
exp. no.	helper template	helper/ construct [ng/ul]	donor name	insert (plasmid) size (bp)	no. injected embryos	no. larvae hatched	hatch rate (%)	no. adults	adult eclosion rate (%)	no. single/group crossed G0	group size	no. all G0 families	no. fertile G0 families	% fertile G0 families	no. transgenic G0 families	total no. transg. events	no. transg. events/ G0 founder	total no. G1 screened	total no. G1 of transg. fam.	no. pos. G1 of transg. fam.	% pos. G1 within transg. fam.	no. inj. embryos/ transg. line	no. G0 adults / transg. line	total no. G1 screened / transg. line	G1 with multiple integrations	% multiple integrations	max. no. integr. / individual	transf. eff. (%)
1	plasmid	300/150	AH452	5267 (8649)	623	182	29.2135	143	78.5714	143/0	7-15	8	8	100	4	4	1	n.d	n.d	n.d	n.d	155.75	35.75	n.d	0	0	1	2.7972
2	plasmid	200/500	V3	3545 (6911)	234	73	31.1966	63	86.3014	8/72	1-15	25	13	52	1	1	1	8830	1929	19	0.984966	234	63	8830	0	0	1	1.5873
3	plasmid	400/600	V285	5180 (8682)	705	182	25.8156	117	64.2857	1/116	1-11	18	16	88.8889	2	2	1	14966	395	43	10.8861	352.5	58.5	7483	0	0	1	1.7094
4	plasmid	300/500	V286	5600 (9102)	680	91	13.3824	38	41.7582	9/30	1-8	15	9	60	0	0	n.a.	8772	n.a.	n.a.	n.a.	n.a.	n.a.	n.a.	n.a.	n.a.	n.a.	0
5	plasmid	160/185	V258	6190 (9690)	922	96	10.4121	65	67.7083	2/63	1-7	18	15	83.3333	0	0	n.a.	6631	n.a.	n.a.	n.a.	n.a.	n.a.	n.a.	n.a.	n.a.	n.a.	0
6	plasmid	400/600; 228/342	V258	6190 (9690)	599	145	24.207	85	58.6207	0/85	3-16	11	11	100	0	0	n.a.	18721	n.a.	n.a.	n.a.	n.a.	n.a.	n.a.	n.a.	n.a.	n.a.	0
7	plasmid	300/150	V257	7088 (10587)	1113	474	42.5876	362	76.3713	0/362	2-15	26	26	100	2	2	n.d.	93998	6610	14	0.0148939	556.5	181	46999	0 of 2	0	n.d.	0.552486
8	plasmid	200/500	V19	3630 (7163)	257	47	18.2879	30	63.8298	0/60	4-15	9	9	100	2	2	1	5185	1558	154	2.97011	128.5	15	2592.5	1 of 2	50	2	6.66667
9	plasmid	300/500	V19	3630 (7163)	192	65	33.8542	40	61.5385	0/45	2-9	11	7	63.6364	0	0	n.a.	2679	n.a.	n.a.	n.a.	n.a.	n.a.	n.a.	n.a.	n.a.	n.a.	0
10	plasmid	200/500	V19	3630 (7163)	399	54	13.5338	33	61.1111	2/31	1-5	13	6	46.1538	0	0	n.a.	1313	n.a.	n.a.	n.a.	n.a.	n.a.	n.a.	n.a.	n.a.	n.a.	0
11	plasmid	200/500	V19	3630 (7163)	462	68	14.7186	33	48.5294	0/33	8-9 ***	7	7	100	2	2	1	1389	150	6	0.431965	231	16.5	694.5	1 of 2	50	1	6.06061
12	plasmid	300/300	V368	5835 (11097)	257	15	5.83658	9	60	6/3	1 (M), 1-5 (F)	7	3	42.8571	0	0	n.a.	502	n.a.	n.a.	n.a.	n.a.	n.a.	n.a.	n.a.	n.a.	n.a.	0
13	plasmid	100/300	V368	5835 (11097)	148	8	5.40541	5	62.5	3/2	1 (M), 1-5 (F)	4	3	75	0	0	n.a.	382	n.a.	n.a.	n.a.	n.a.	n.a.	n.a.	n.a.	n.a.	n.a.	0
avg							20.6501		63.9328					77.8361							3.0576	276.375	61.625	13319.8		16.6667	1.2	1.49028
note: this list excludes 6 large scale injection experiments which did not produce a single transgenic line, as it can't be excluded that the failure to create transgenic lines in these experiments was due to the injected transgene construct causing lethality in successfully transformed G0/G1
14	mRNA	182/300	V96	5278 (8813)	113	13	11.5044	6	46.1538	6/0	1	6	3	50	1	≥ 4	4	370	117	25	21.3675	28.25	1.5	370	1 of 4	25	4	66.6667
15	mRNA	182/300	V97	4307 (7841)	298	15	5.03356	11	73.3333	11/0	1	11	4	36.3636	2	≥ 7	≥ 2 - ≥5	514	179	51	28.4916	42.5714	1.57143	257	6 of 7	85.7143	6	63.6364
16	mRNA	300/300	V370	5870 (11131)	576	180	31.25	156	86.6667	0/156	(2-) 15	12	12	100	11	≥ 19 **	≥1	4388	4213	128	3.03822	30.3158	8.21053	398.909	12 of 19	63.1579	2	12.1795
17	mRNA	300/300	V369	6420 (11684)	520	85	16.3462	68	80	0/68	(2-) 15	6	6	100	5	≥ 8 **	≥1	2173	2068	44	2.12766	65	8.5	434.6	2 of 8	25	2	11.7647
18	mRNA	300/300	V19	3630 (7163)	527	47	8.91841	23	48.9362	22/11	1 (M), 1-4 (F)	28	17	60.7143	10	≥ 24	1 - ≥5	1813	1813	1247	68.781	21.9583	0.958333	181.3	12 of 19	63.1579	18	104.348
19	mRNA	100/300	V19	3630 (7163)	310	17	5.48387	12	70.5882	10/2	1 (M), 1-4 (F)	9	6	66.6667	2	≥ 7	≥3 - ≥4	1195	1195	211	17.6569	44.2857	1.71429	597.5	6 of 11	54.5455	4	58.3333
20	mRNA	100/300	V19	3630 (7163)	646	10	1,61 ****	8	80	6/2	1 (M), 1-2 (F)	7	7	100	3	≥ 4	1 - 2	1030	331	97	29.3051	161,5 ****	2	257.5	1 of 4	25	2	50
21	mRNA	300/300	V368	5835 (11097)	449	33	7.34967	22	66.6667	17/5	1 (M), 1-5 (F)	18	10	55.5556	5	≥ 12	≥2 - 4	1014	589	314	53.3107	37.4167	1.83333	202.8	7 of 12	58.3333	9	54.5455
22	mRNA	100/300	V368	5835 (11097)	281	14	4.98221	12	85.7143	5/7	1 (M), 1-5 (F)	7	6	85.7143	5	≥ 9	1 - ≥3	870	600	153	25.5	31.2222	1.33333	174	5 of 9	55.5556	14	75
avg							11.3585		70.8955					72.7794							27.731	37.6275	3.06903	319.29		50.6072	6.77778	55.1638
