# Supplementary material for: Improved <em>piggyBac</em> Transformation with Capped Transposase mRNA in Pest Insects
Source: Preprints.org preprint supplement (doi:10.20944/preprints202308.2202.v1), 2023-09-01
Supplement: Supplementary file 3 [file Table S3.xlsx]

## Sheet: G0 indiv backcrosses
V19
name G0	# G0 founder	name G1	# G1 founder	# G1 analyzed	ddPCR integration events	min. # diff events per G0 famliy	min. # diff. events per G0 founder	gen. Integration site:
V19-M34	1	V19-M34M1	1 male	1	2	3	3
		V19-M34M2	1	1	3
		V19-M34M3	1	1	2
		V19-M34F2	2 females	2	2, 3
		V19-M34M6	1	1	1			Chromosome 1, 265,027,382
V19-M37	1	V19-M37M1	1	1	3	4	4
		V19-M37M2	1	1	4
		V19-M37M5	16	3	2, 1, 2
V19-M41	1	V19-M41M1	1	1	1	2	2	Chromosome 2, 69,308,677
		V19-M41F1	1	1	1			Chromosome 3, 265,183,726
V19-M45	1	V19-M45M1	1	1	3	5	5
		V19-M45M3	1	1	4
		V19-M45M7	6	3	1, 3, 5
		V19-M45F2	7	3	2, 1, 2
V19-M46	1	V19-M46M1	1	1	13	2	2
		V19-M46M2	1	1	11
V19-M47	1	V19-M47M1	1	1	10	5	5
		V19-M47M2	1	1	18
		V19-M47M3	1	1	8
		V19-M47M4	1	1	6
		V19-M47F2	6	3	5, 5, 6
V19-F18	3	V19-F18M1	1	1	6	5	1.66667
		V19-F18M3	1	1	6
		V19-F18M5	1	1	4
		V19-F18M7	1	1	1			not analyzed
		V19-F18M11	15	3	3, 1, 4
		V19-F18F3	23	3	1, 3, 2
V19-M51	1	V19-M51M1	231	not further analyzed		1	1
V19-M52	1	V19-M52M1	115			1	1
V19-M55	1	V19-M55F1	5			1	1
V19-F20	4	V19-F20M1	18			1	1
V19-F23	2	V19-F23M1	37			1	1
total known number of independent events:	7	300 ng/ul helper, 100 ng/ul mRNA	24	300 ng/ul helper, 300 ng/ul mRNA
V96
G0 family	# G0	G1 family	# G1	# G1 analyzed	ddPCR integration events	min. # diff events per G0 famliy	min. # diff. events per G0 founder	gen. Integration site:
V96-F1_orl	1	V96-F1-M1_orl	1	1	?	4	4
		V96-F1-M2_orl	1	1	1			Chromosome 1, 294,726,373
		V96-F1-M3_orl	1	1	1			Chromosome 2, 238,434,5
		V96-F1-M4_orl	1	1	1			Chromosome 2, 238,434,5
		V96-F1-M7_orl	1	1	1			Chromosome 1, 294,726,373
		V96-F1-M8_orl	1	1	2
		V96-F1-F1_orl	1	1	1			not solved
total known number of independent events:	4
V97
G0 family	# G0	G1 family	# G1	# G1 analyzed	ddPCR integration events	min. # diff events per G0 famliy	min. # diff. events per G0 founder	gen. Integration site:
V97-F1_orl	1	V97-F1-M1_orl	1	1	6.4	5	5
		V97-F1-M2_orl	1	1	1			Chromosome 2, 22,977,773
		V97-F1-M3_orl	1	1	1			Chromosome 2, 22,977,773
		V97-F1-M4_orl	1	1	1			Chromosome 2, 22,977,773
		V97-F1-M5_orl	1	1	2.6
		V97-F1-M6_orl	1	1	1			Chromosome 2, 22,977,773
		V97-F1-M7_orl	1	1	2
		V97-F1-F1_orl	1	1	2
		V97-F1-F2_orl	1	1	3
		V97-F1-F3_orl	1	1	3
		V97-F1-F5_orl	1	1	1			Chromosome 2, 22,977,773
		V97-F1-F7_orl	1	1	4
V97-M4_orl	1	V97-M4-M1_orl	1	1	3	2	2
		V97-M4-M3_orl	1	1	2.3
		V97-M4-M5_orl	1	1	2
		V97-M4-F1_orl	1	1	2
		V97-M4-F3_orl	1	1	3
		V97-M4-F4_orl	1	1	2
		V97-M4-F5_orl	1	1	2
		V97-M4-F6_orl	1	1	2
		V97-M4-F7_orl	1	1	2
		V97-M4-F9_orl	1	1	2
		V97-M4-F10_orl	1	1	2
total known number of independent events:	7
V368
G0 family	# G0	G1 family	# G1	# G1 analyzed	ddPCR integration events	min. # diff events per G0 famliy	min. # diff. events per G0 founder	gen. Integration site:
V368-M1	1	V368-M1M1	1	1	2	2	2
		V368-M1M2	1	1	1			Chromosome 3, 94787209
		V368-M1M3	1	1	1			not analyzed
V368-M20	1	V368-M20M1	1	1	1	1	1	not analyzed
V368-M22	1	V368-M22M1	1	1	1	1	1	not analyzed
		V368-M22M2	1	1	1			Chromosome 3, 5813446
		V368-M22M3	1	1	1			Chromosome 3, 5813446
		V368-M22M4	1	1	1			not analyzed
V368-F1	3	V368-F1M1	1	1	3	2	0.666667
		V368-F1M2	1	1	1			Chromosome 3, 129318883
		V368-F1M4	1	1	3
		V368-F1M5	1	1	1			not analyzed
V368-F4	4	V368-F4M1	1	1	7	3	0.75
		V368-F4M3	1	1	(4.5)
		V368-F4M4	1	1	5
		V368-F4M5	1	1	14
V368-M2	1	V368-M2M1	1	1	1	2	2	not analyzed
		V368-M2M2	1	1	2
		V368-M2M3	1	1	2
V368-M7	1	V368-M7M1	1	1	2	2	2
		V368-M7F1	1	1	1			Chromosome 3, 81328378
V368-M8	1	V368-M8M1	1	1	1	4	4	not analyzed
		V368-M8M2	1	1	4
		V368-M8M3	1	1	8
		V368-M8M5	1	1	9
V368-M12	1	V368-M12M1	1	1	1	2	2	Chromosome 3, 51478716
		V368-M12M2	1	1	1			Chromosome 3, 51478716
		V368-M12M3	1	1	1			Chromosome 2, 123169378
		V368-M12M4	1	1	1			Chromosome 3, 51478716
V368-M14	1	V368-M14M1	1	1	1	2	2	not analyzed
		V368-M14M2	1	1	1			Chromosome 2, 5756115
		V368-M14M3	1	1	6
		V368-M14M4	1	1	6
		V368-M14M5	1	1	1			not analyzed
						* by genomic int. site
total known number of independent events:	9	300 ng/ul helper, 100 ng/ul mRNA	12	300 ng/ul helper, 300 ng/ul mRNA

## Sheet: G0 group backcrosses
V369
name G2	# G2 founder	name G3	# G3 founder	# G3 analyzed	ddPCR integration events	min. # diff events per G2 famliy	min. # diff. events per G2 founder	genom. integr. position
MS0118-M1R	group of females	V369-M1RM1	1 male	1	1	3	1	Chromosome 2, 443084438
		V369-M1RM2	1 male	1	?
		V369-M1RM3	1 male	1	1			Chromosome 3, 382187605
		V369-M1RM4	1 male	1	1			Chromosome 3, 382187605
		V369-M1RM5	1 male	1	2
		V369-M1RM6	4 males		-
		V369-M1RM7	85 males		-
		V369-M1RF1	1 female	1	2
MS0118-F1	group of females	V369-F1M1	1 male	1	1	1	1	Chromosome 2, 353272628
		V369-F1M2	1 male		n/d
		V369-F1F2	1 female	1	1			Chromosome 2, 353272628
		V369-F1M3	64 males		-
MS0118-M3	group of females	V369-M3M1	1 male		n/d	1	1
		V369-M3M2	1 male	1	2
		V369-M3M3	1 male	1	2
		V369-M3F1	1 female	1	2
		V369-M3M4	80 males		-
MS0118-M2RG	group of females	V369-M2RGM1	1 male	1	1	1	1	Chromosome 1, 96783588
		V369-M2RGM2	1 male	1	1			Chromosome 1, 96783588
		V369-M2RGM3	41 males		-
MS0118-F2RG	group of females	V369-F2RGM1	1 male	1	1	1	1	Chromosome 2, 132677979
		V369-F2RGM2	1 male	1	1			Chromosome 2, 132677979
		V369-F2RGM3	18 males		-
MS0118-M1RG	group of females	V369-M1RGM1	1 male	1	1	1	1	Chromosome 2, 353321277
		V369-M1RGM2	1 male	1	1			Chromosome 2, 353321277
		V369-M1RGM3	29 males		-
total known number of indep events:	8
V370
name G2	# G2 founder	name G3	# G3 founder	# G3 analyzed	ddPCR integration events	min. # diff events per G2 famliy	min. # diff. events per G2 founder	genom. integr. position
MS0218-M1	large group	MS0218-M1M1	1 male	1	?	2	1
		MS0218-M1M2	1 male	1	1			not solved
		MS0218-M1M3	1 male	1	2
		MS0218-M1M4	group male
MS0218-M2		MS0218-M2M1	1 male	1	2	3	1
		MS0218-M2M2	1 male	1	1.67
		MS0218-M2M3	1 male	1	3.55
		MS0218-M2M4	group male
		MS0218-M2M5	group male
		MS0218-M2M6	group male
MS0218-M3		MS0218-M3M1	1 male	1	2	1	1
		MS0218-M3M2	1 male	1	2
		MS0218-M3M3	group male
		MS0218-M3F1	group female
MS0218-M4		MS0218-M4M1	1 male	1	2	1	1
		MS0218-M4M2	1 male	1	2
		MS0218-M4M3	group male
		MS0218-M4F1	group female
MS0218-M5		MS0218-M5M1	1 male	1	1	2	1	Chromosome 2, 111958339
		MS0218-M5M2	1 male	1	2
		MS0218-M5M3	1 male	1	2
		MS0218-M5M4	1 male	1	2
		MS0218-M5M5	group male
		MS0218-M5M6	group male
		MS0218-M5M7	group male
		MS0218-M5M8	1 male	1	2
MS0218-M6		MS0218-M6M1	1 male	1	1	2	1	s
		MS0218-M6M2	1 male	1	2
		MS0218-M6M3	group male
		MS0218-M6M4	group male
		MS0218-M6M5	group male
MS0218-F1		MS0218-F1M1	group male
		MS0218-F1M2	group male
name G2	# G2 founder	name G3	# G3 founder	name G4	# G4 founder	# G4 analyzed	ddPCR integration events	min. # diff events per G2 famliy	min. # diff. events per G2 founder	genom. integr. position
MS0218-F2		MS0218-F2M1	group male
		MS0218-F2M2	group male	V370-F2M2M1	1 male	1	1	3	1	chromosome 2, 105,857,572
				V370-F2M2M2	1 male	1	1			chromosome 2, 122,854,917
				V370-F2M2M4	1 male	1	2
				V370-F2M2M5	1 male	1	1			chromosome 2, 105,857,572
				V370-F2M2M6	1 male	1	1			chromosome 2, 105,857,572
				V370-F2M2M8	1 male	1	1			chromosome 2, 105,857,572
				V370-F2F1M1	1 male	1	1			chromosome 2, 122,854,917
				V370-F2F1M3	1 male	1	1			chromosome 2, 122,854,917
		MS0218-F2F1	group female	V370-F2F1M4	1 male	1	1			chromosome 2, 122,854,917
				V370-F2F1M5	1 male	1	1			chromosome 2, 122,854,917
				V370-F2F1M6	1 male	1	1			no PCR product
				V370-F2F1M8	1 male	1	1			chromosome 2, 122,854,917
name G2	# G2 founder	name G3	# G3 founder	name G4	# G4 founder	# G4 analyzed	ddPCR integration events	min. # diff events per G2 famliy	min. # diff. events per G2 founder	genom. integr. position
MS0218-F3		MS0218-F3M1	group male
		MS0218-F3M2	group male	MS0218-F3M2m1	1 male	1	1	1	1	not solved
				MS0218-F3M2m2M2	1 male	1	1			not solved
total known number of indep events:	15
