# Supplementary material for: Improved <em>piggyBac</em> Transformation with Capped Transposase mRNA in Pest Insects
Source: Preprints.org preprint supplement (doi:10.20944/preprints202308.2202.v1), 2023-09-01
Supplement: Supplementary file 4 [file Table S4.xlsx]

## Sheet: Sheet1
exp. no.	helper template	helper/ construct [ng/ul]	donor name	insert (plasmid) size (bp)	injected embryos*	larvae hatched	hatch rate	final adults	adult emergence rate (%)	no. indiv. backcrossed G0 adults	no. fertile single founder families	% fertile G0 indiv
2	plasmid	200/500	V3	3545 (6911) bp	234	73	31.1966	63	86.3014	8	5	62.5
4	plasmid	300/500	V286	5600 (9102) bp	680	91	13.3824	38	41.7582	9	3	33.3333
12	plasmid	300/300	V368	5835 (11097) bp	257	15	5.83658	9	60	6	4	66.6667
13	plasmid	100/300	V368	5835 (11097) bp	148	8	5.40541	5	62.5	3	2	66.6667
											avg	57.2917
14	mRNA	182/300	V96	5278 (8813) bp	113	13	11.5044	6	46.1538	6	3	50
15	mRNA	182/300	V97	4307 (7841) bp	298	15	5.03356	11	73.3333	11	4	36.3636
18	mRNA	300/300	V19	3630 (7163) bp	527	47	8.91841	23	48.9362	23	13	56.5217
19	mRNA	100/300	V19	3630 (7163) bp	310	17	5.48387	12	70.5882	8	6	75
20	mRNA	100/300	V19	3630 (7163) bp	646	10	1,61 ****	8	80	6	3	50
21	mRNA	300/300	V368	5835 (11097) bp	449	33	7.34967	22	66.6667	17	9	52.9412
22	mRNA	100/300	V368	5835 (11097) bp	281	14	4.98221	12	85.7143	5	4	80
											avg	57.2609
