# Supplementary material for: Improved <em>piggyBac</em> Transformation with Capped Transposase mRNA in Pest Insects
Source: Preprints.org preprint supplement (doi:10.20944/preprints202308.2202.v1), 2023-09-01
Supplement: Supplementary file 5 [file Table S5.xlsx]

## Sheet: Sheet1
exp. no.	helper template	[helper/ construct] (ng/ul)	donor construct	insert (plasmid) size (bp)	no. injected embryos	no. larvae hatched	hatch rate (%)	no. adults	adult eclosion rate (%)	no. single/group crossed G0	group size	no. all G0 families	no. fertile G0 families	% fertile G0 families	no. transgenic G0 families	total no. transg. events	no. transg. events/ G0 founder	total no. G1 screened	total no. G1 of transg. fam.	no. pos. G1 of transg. fam.	% pos. G1 within transg. fam.	no. inj. embryos/ transg. line	no. G0 adults / transg. line	total no. G1 screened / transg. line	G1 with multiple integrations	% multiple integrations	max. no. integr. / individual	transf. eff. (%)
1	mRNA	300/150	Modified AH452 (pXL-BACII_FRT_3xP3DsRed_FRT3_loxN-PUbeCFP-lox2272)	5205 (7845) bp	721	285	39.5284	238	83.5088	0/238	10-15	19	19	100	15	≥ 15	≥1	7049	6135	155	2.19889	48.0667	15.8667	469.933	n.d.	n.d.	n.d.	6.30252
