# Supplementary material for: Improved <em>piggyBac</em> Transformation with Capped Transposase mRNA in Pest Insects
Source: Preprints.org preprint supplement (doi:10.20944/preprints202308.2202.v1), 2023-09-01
Supplement: Supplementary file 6 [file Table S6.xlsx]

## Sheet: Sheet1
Exp. no	helper template	[helper/ donor] (ng/ul)	donor construct	no. injected embryos	no. larvae hatched	hatch rate (%)	no. adults	eclosion rate (%)	no. single/group crossed	group size	total no. G0 families	no. fertile G0 families	% fertile families	no. transg. G0 families	no. transg events	total G1 screened	no. G1 screened / transg. event	no. inj. embryos/ transg. event	no. transg. events/ G0	recomb. eff. (%)
1	phsp-phiC31	150/300	V101	510	16	3.13725	12	75	6/6	1 (M), 1-2 (F)	9	6	66.6667	0	0	1690	n.a.	n.a.	n.a.	0
2	phsp-phiC31	150/300	V101	237	18	7.59494	11	61.1111	1/10	1-2 (M), 4 (F)	5	5	100	0	0	2851	n.a.	n.a.	n.a.	0
3	mRNA	150/300	V101	502	22	4.38247	13	59.0909	9/4	1 (M), 1-2 (F)	11	4	36.3636	0	0	534	n.a.	n.a.	n.a.	0
4	mRNA	150/300	V101	335	11	3.28358	6	54.5455	2/4	1 (M), 1-2 (F)	4	2	50	0	0	458	n.a.	n.a.	n.a.	0
5	mRNA	150/300	V101	361	12	3.3241	10	83.3333	10/0	1 (M), 1(F)	7	4	57.1429	1 a)	1	318	318	361	1	10
6	phsp-phiC31	300/500	V101	443	12	2.7088	11	91.6667	5/4	1 (M), 1-2 (F)	9	4	44.4444	0	0	1059	n.a.	n.a.	n.a.	0
7	phsp-phiC31	300/500	V101	302	40	13.245	31	77.5	0/31	2 (M), 2-5 (F)	11	9	81.8182	2	2 b)	6068	3034	151	1	6.45161
8	mRNA	300/500	V101	412	9	2.18447	9	100	9/0	1 (M), 1 (F)	9	9	100	0	0	6250	n.a.	n.a.	n.a.	0
9	mRNA	300/500	V101	248	34	13.7097	25	73.5294	1/24	1-2 (M), 2-5 (F)	10	6	60	0 c)	0	3650	n.a.	n.a.	n.a.	0
I	phsp-phiC31	400/600	V101	779 d)	101	12.9653	58	57.4257	1/57	1-6 (M), 7-8 (F)	11	9	81.8182	3	4 f)	5126	1281.5	194.75	1	6.89655
II	phsp-phiC31	200/300	V101	767 d)	48	6.25815	23	47.9167	1/22	1-6 (M), (F)	6	6	100	1	2 g)	3490	1745	383.5	1	8.69565
III	phsp-phiC31	mixed e)	V101				9		0/9	5 (M), 4 (F)	2	2	100	1	1	588	588		1	11.1111
IV	phsp-phiC31	400/600	V301	724	122	16.8508	48	39.3443	0/48	2-7	9	8	88.8889	1	1	9528	9528	724	1	2.08333
V	phsp-phiC31	400/600	V303	640	69	10.7812	46	66.6667	0/46	4-7	8	8	100	3	3	7377	2459	213.34	1	6.52174
a) RMCE phenotype; one additional family with transient donor phenotype; parental phenotype in next generation
b) both integration events
c) one family with transient donor phenotype; parental phenotype in next generation
d) all injected eggs counted
e) mixed larvae either from the 400/600 or 200/300 injection
f) 2 RMCE and 2 integration events
g) 1 RMCE and 1 integration event
