# Supplementary material for: Improved <em>piggyBac</em> Transformation with Capped Transposase mRNA in Pest Insects
Source: Preprints.org preprint supplement (doi:10.20944/preprints202308.2202.v1), 2023-09-01
Supplement: Supplementary file 7 [file Table S7.xlsx]

## Sheet: Tabelle1
Exp. no	helper template	[helper/ donor] (ng/ul)	donor construct	no. injected embryos	no. larvae hatched	hatch rate (%)	no. adults	adult eclosion rate (%)	no. single/group crossed	group size	total no. G0 families	no. fertile G0 families	% fertile families	no. transg. G0 families	no. transg events	total G1 screened	no. G1 screened / transg. event	no. inj. embryos/ transg. event	no. transg. events/ founder	recomb. eff. (%)
1	phsp-Cre	450/350	V20	765	143	18.6928	82	57.3427	0/82	2-6 (M), 2-12 (F)	13	12	92.3077	2 *	2	9283	4641.5	382.5	1	2.43902
2	phsp-Cre	450/350	V20	165	11	6.66667	8	72.7273	0/8	2 (M), 2 (F)	4	1	25	0	0	390	n.a.	n.a.	n.a.	0
3	phsp-Cre	450/350	V20	397	5	1.25945	4	80	2/2	1 (M), 2 (F)	3	1	33.3333	0	0	137	n.a.	n.a.	n.a.	0
4	mRNA	450/350	V20	413	45	10.8959	33	73.3333	1/32	2-6 (M)/ 1-12 (F)	4	1	25	1 **	1	2419	390	413	0	3.0303
5	mRNA	450/350	V20	230	12	5.21739	7	58.3333	0/7	2 (M), 3 (F)	3	3	100	0	0	996	n.a.	n.a.	n.a.	0
6	mRNA	450/350	V20	348	20	5.74713	16	80	10/6	1 (M), 1-4 (F)	12	9	75	0	0	4926	n.a.	n.a.	n.a.	0
* 1 integration, one RMCE phenotype
** integration phenotype
