# Supplementary material for: Improved <em>piggyBac</em> Transformation with Capped Transposase mRNA in Pest Insects
Source: Preprints.org preprint supplement (doi:10.20944/preprints202308.2202.v1), 2023-09-01
Supplement: Supplementary file 8 [file Table S8.xlsx]

## Sheet: Sheet1
exp. no.	helper template	[helper/ construct] (ng/ul)	donor construct	insert (plasmid) size (bp)	no. injected embryos	no. larvae hatched	hatch rate (%)	no. adults	adult eclosion rate (%)	no. single/group crossed G0	group size	no. all G0 families	no. fertile G0 families	% fertile G0 families	no. transgenic G0 families	total no. transg. events	no. transg. events/ G0 founder	total no. G1 screened	total no. G1 of transg. fam.	no. pos. G1 of transg. fam.	% pos. G1 within transg. fam.	no. inj. embryos/ transg. line	no. G0 adults / transg. line	total no. G1 screened / transg. line	recomb. eff. (%)
1	phsp-Cre	150/250	AH460 (pSL_loxN_3xP3AmCyn_lox2272)	1249 (4473) bp	531	103	19.3974	74	71.8447	0/74	4-12 (F)	6	6	100	1	≥ 1	≥1	3545	126	27	0.761636	531	74	3545	1.35135
2	phsp-Cre	150/250	AH460 (pSL_loxN_3xP3AmCyn_lox2272)	1249 (4473) bp	388	62	15.9794	44	70.9677	28/16	1 (M), 1-3 (F)	36	34	94.4444	1	≥1	≥1	4834	187	77	1.59288	388	44	4834	2.27273
3	mRNA	190/250	AH460 (pSL_loxN_3xP3AmCyn_lox2272)	1249 (4473) bp	507	75	14.7929	62	82.6667	39/23	1 (M), 1-3 (F)	50	46	92	0	0	n.a.	6349	n.a.	n.a.	n.a.	n.a.	n.a.	n.a.	0
