# Supplementary figures and images for: Improved <em>piggyBac</em> Transformation with Capped Transposase mRNA in Pest Insects
Source: Preprints.org preprint supplement (doi:10.20944/preprints202308.2202.v1), 2023-09-01

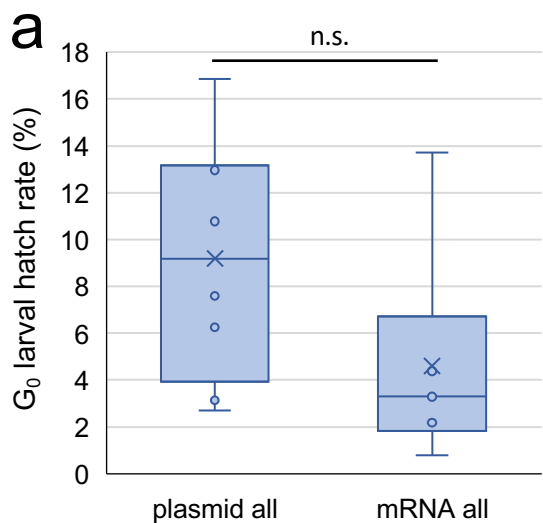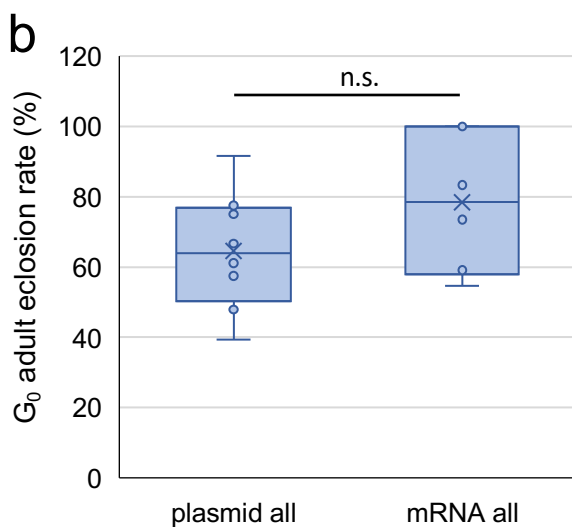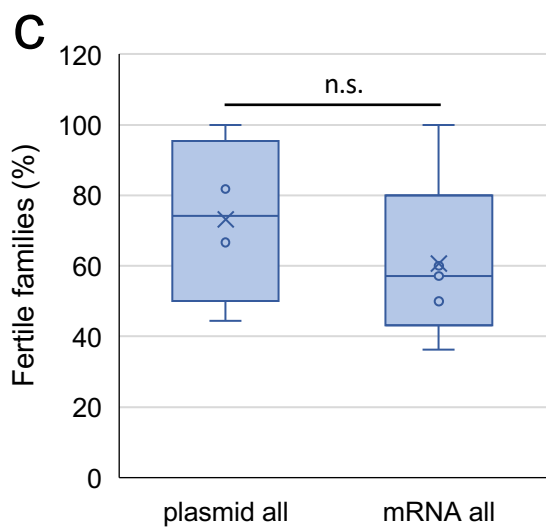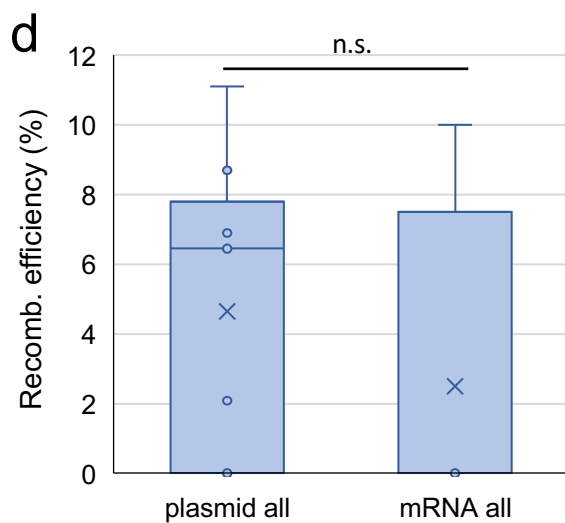

Supplement: Supplementary file 2 [file supplementary]

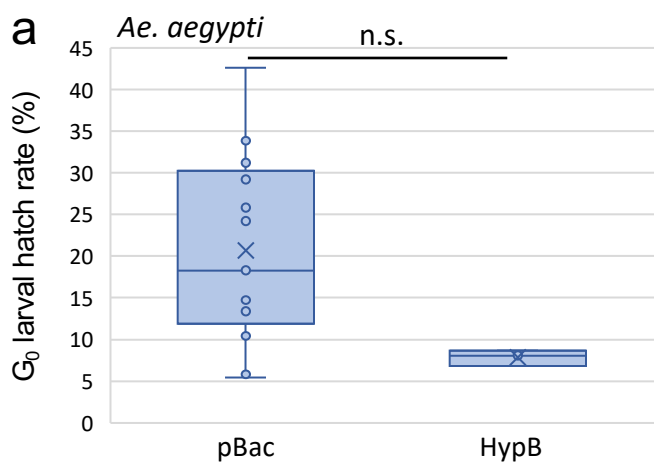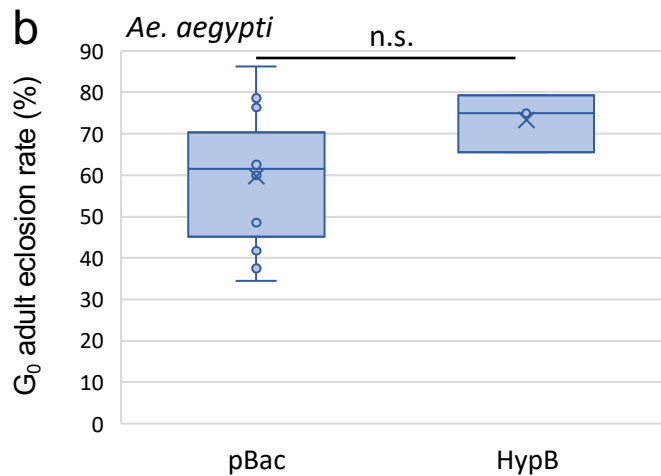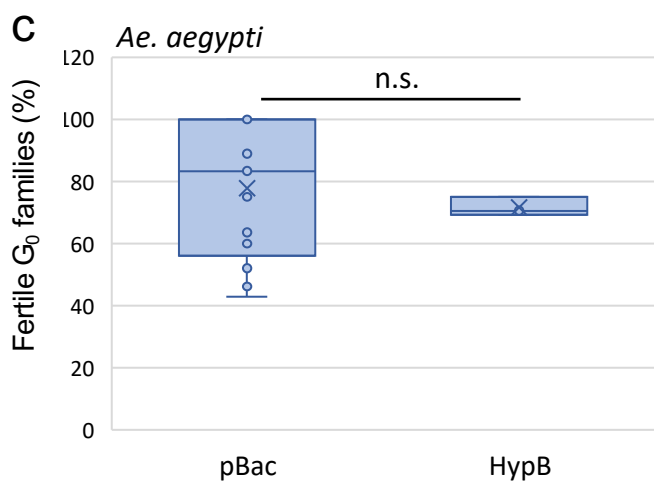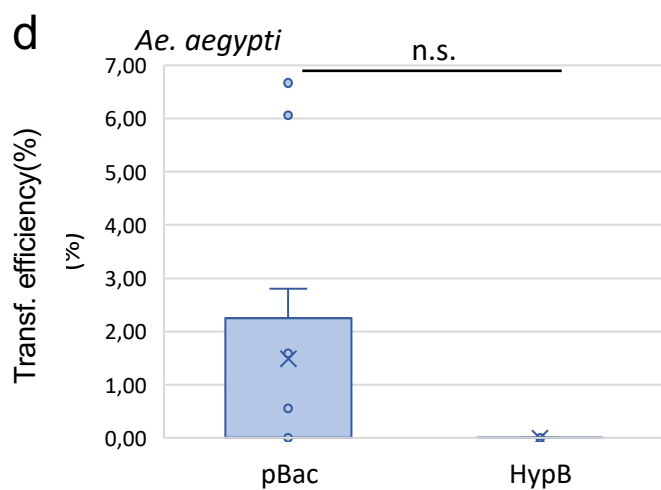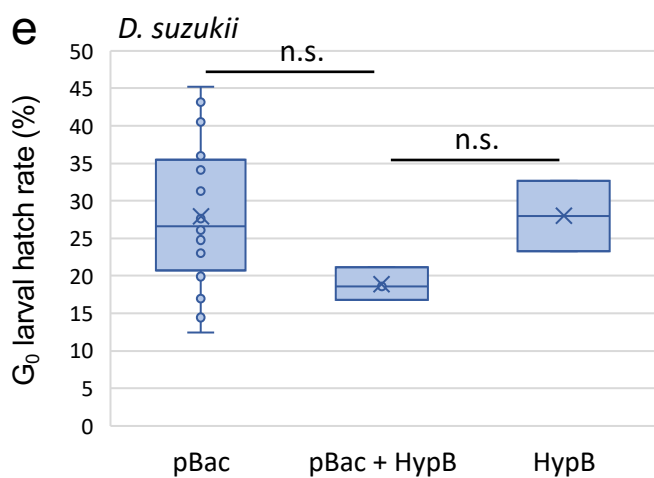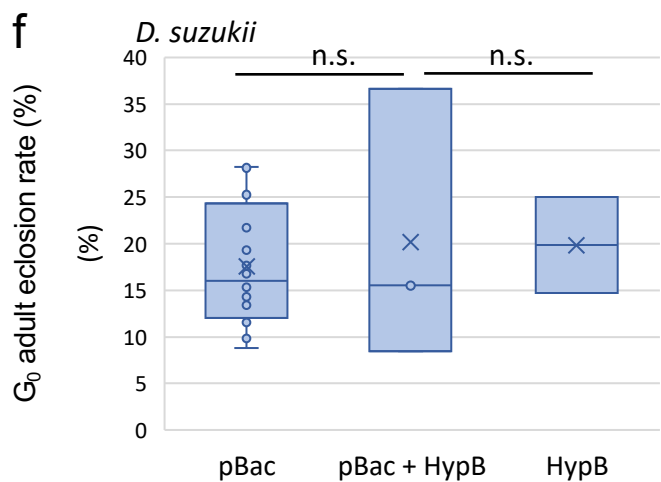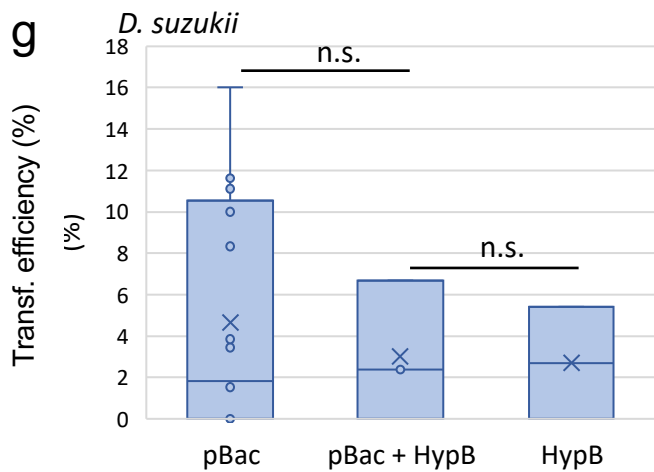

Supplement: Supplementary file 3 [file supplementary]
